# Supplementary material for: Phylogeny and evolution of Rab7 and Rab9 proteins
Source: PubMed Central journal article supplement (PMC2693434; doi:10.1186/1471-2148-9-101), 2009-05-14

The tree used in topology tests as a competitive topology to the ML tree presented in Figure 1 and Additional file 1. The tree assumes parsimonious and probable relationships between analyzed sequences based on their taxonomical distribution and the recent views on phylogeny of eukaryotes (see Additional file 2 for references). The contracted clades are fully shown in Additional file 1.

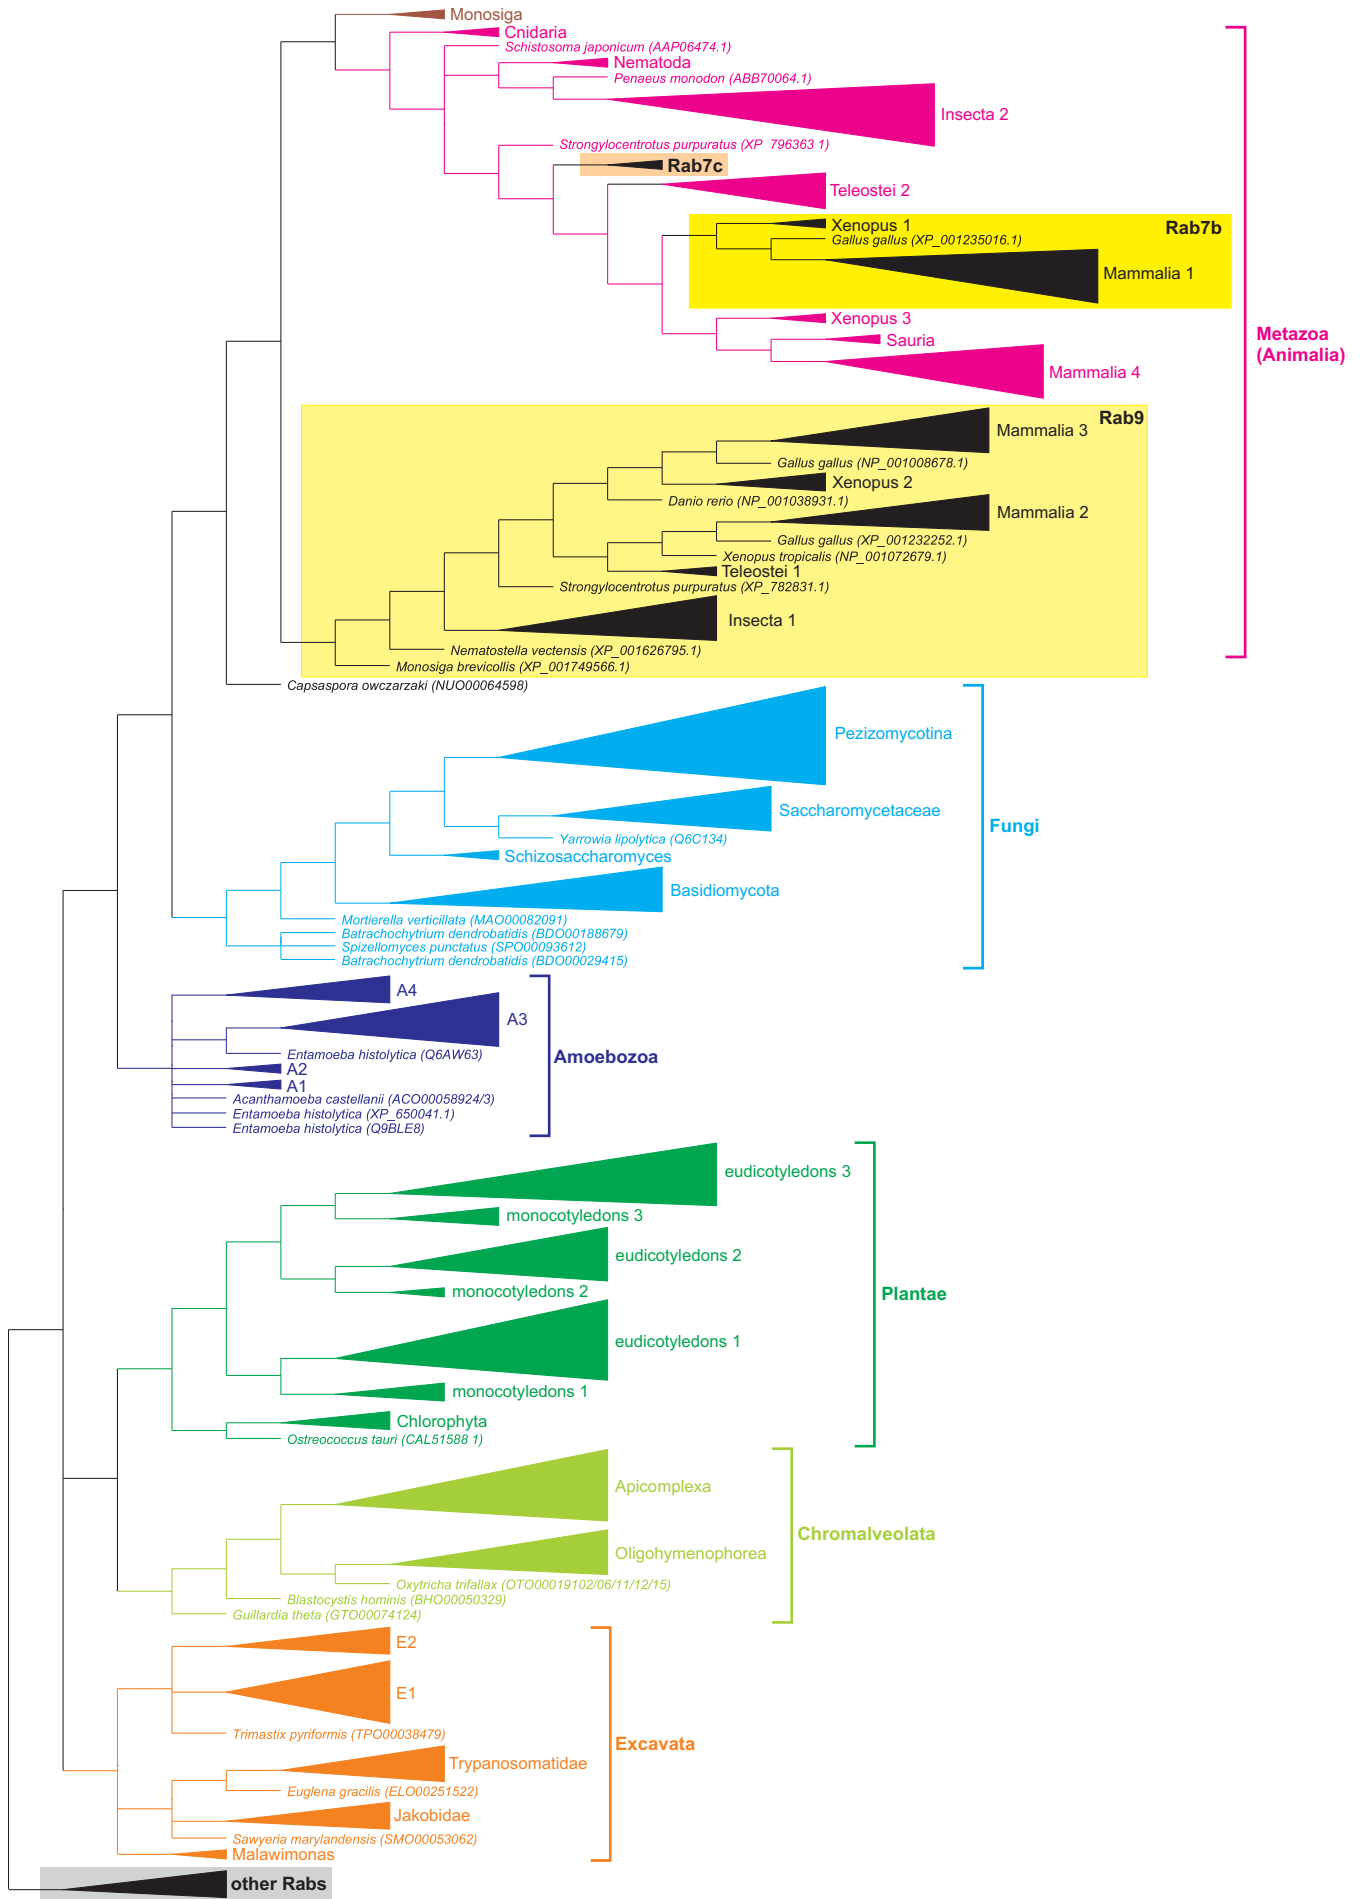

Supplement: 1471-2148-9-101-S3.pdf [file 1471-2148-9-101-S3.pdf]
