# Supplementary material for: Phylogeny and evolution of Rab7 and Rab9 proteins
Source: PubMed Central journal article supplement (PMC2693434; doi:10.1186/1471-2148-9-101), 2009-05-14

The Bayesian tree obtained in PhyloBayes under the CAT+ $\Gamma(5)$  model for 210 amino acid sequences of Rab7 and Rab9 proteins. Numbers at nodes correspond to posterior probabilities. Values lower or equal to 0.50 were omitted.

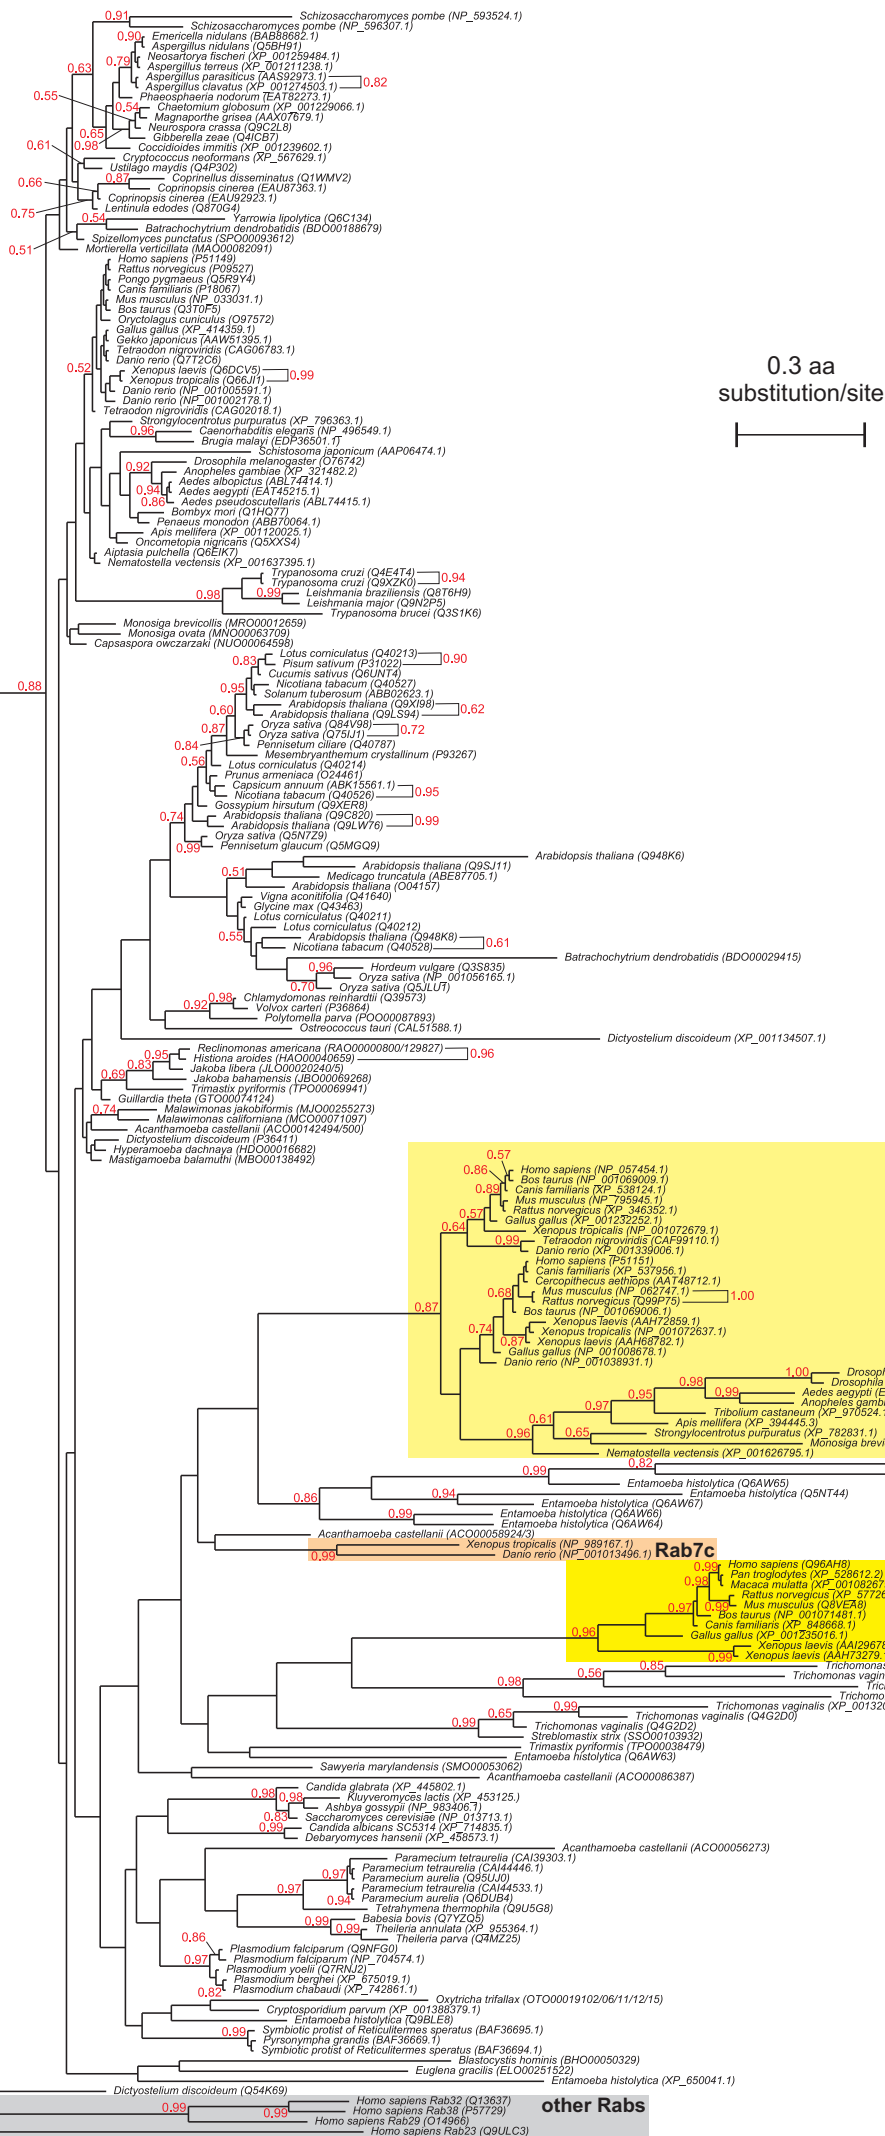

Supplement: 1471-2148-9-101-S4.pdf [file 1471-2148-9-101-S4.pdf]
