# Supplementary material for: Phylogeny and evolution of Rab7 and Rab9 proteins
Source: PubMed Central journal article supplement (PMC2693434; doi:10.1186/1471-2148-9-101), 2009-05-14
Supplement: 1471-2148-9-101-S5.pdf [file 1471-2148-9-101-S5.pdf]

The maximum likelihood tree obtained in PhyML-CAT under the CAT+I+ $\Gamma(5)$  model assuming 30 profile mixture categories for 210 amino acid sequences of Rab7 and Rab9 proteins. Different thickness of branches corresponds to given support value (p) that is the minimum of two support values assessed by the approximate likelihood ratio test (aLRT) based on  $\chi^2$  and Shimodaira-Hasegawa-like procedure.

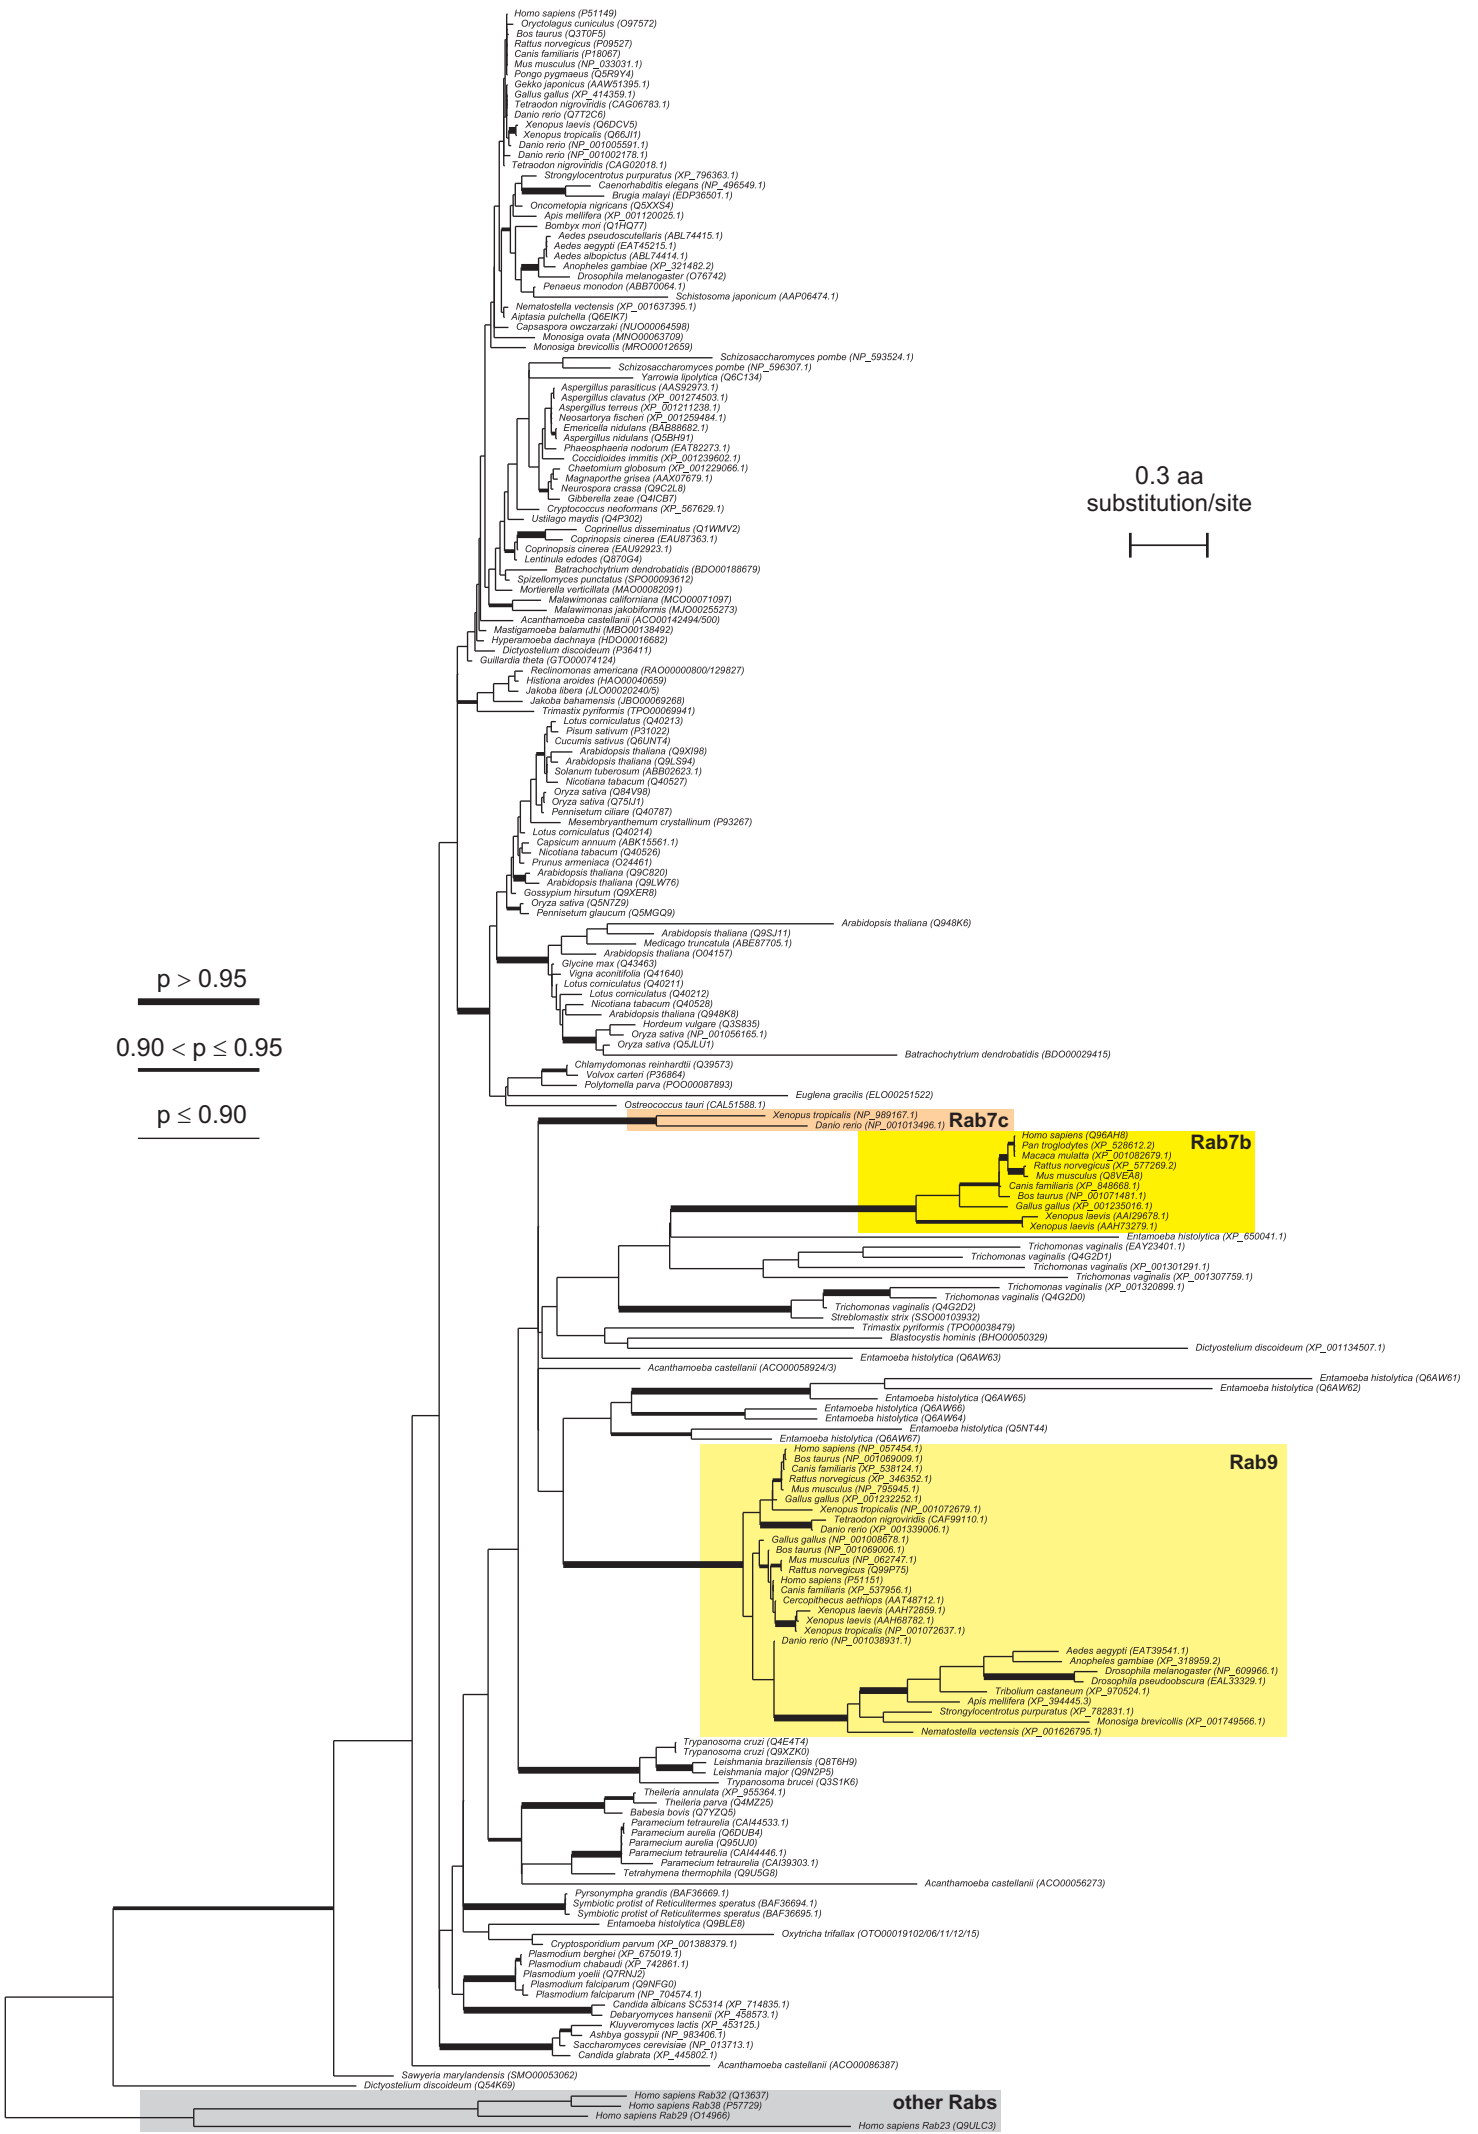

0.3 aa  
substitution/site

$p > 0.95$

$0.90 < p \leq 0.95$

$p \leq 0.90$

**Rab7c**

**Rab7b**

**Rab9**

**other Rabs**

Sawyeria marylandensis (SMO00053062)  
Dicyostelium discoideum (Q54K69)  
Homo sapiens Rab32 (Q13837)  
Homo sapiens Rab38 (P57729)  
Homo sapiens Rab29 (O14966)  
Homo sapiens Rab23 (Q9ULC3)
